# Supplementary material for: A physarum-inspired prize-collecting steiner tree approach to identify subnetworks for drug repositioning
Source: PubMed Central journal article supplement (PMC5249043; doi:10.1186/s12918-016-0371-3), 2016-12-05
Supplement: 12918_2016_371_MOESM1_ESM.pdf [file 12918_2016_371_MOESM1_ESM.pdf]

Table 1: Drug indexes and names

| Index | Drug Name     | Index | Drug Name        | Index | Drug Name         |
|-------|---------------|-------|------------------|-------|-------------------|
| 1     | abacavir      | 2     | acarbose         | 3     | acebutolol        |
| 4     | acetazolamide | 5     | acitretin        | 6     | acyclovir         |
| 7     | adapalene     | 8     | adenosine        | 9     | albendazole       |
| 10    | alclometasone | 11    | alendronate      | 12    | allopurinol       |
| 13    | amantadine    | 14    | amcinonide       | 15    | amifostine        |
| 16    | amikacin      | 17    | amiloride        | 18    | aminoglutethimide |
| 19    | aminophylline | 20    | amiodarone       | 21    | amitriptyline     |
| 22    | amlodipine    | 23    | amoxapine        | 24    | amoxicillin       |
| 25    | ampicillin    | 26    | amprenavir       | 27    | anagrelide        |
| 28    | anastrozole   | 29    | apraclonidine    | 30    | argatroban        |
| 31    | aripiprazole  | 32    | arsenic trioxide | 33    | aspirin           |
| 34    | atenolol      | 35    | atomoxetine      | 36    | atorvastatin      |
| 37    | atovaquone    | 38    | atropine         | 39    | azathioprine      |
| 40    | azelaic acid  | 41    | azelastine       | 42    | azithromycin      |
| 43    | aztreonam     | 44    | bacitracin       | 45    | baclofen          |
| 46    | balsalazide   | 47    | beclomethasone   | 48    | benazepril        |
| 49    | benztropine   | 50    | betaxolol        | 51    | bethanechol       |
| 52    | bexarotene    | 53    | bicalutamide     | 54    | bimatoprost       |
| 55    | biperiden     | 56    | bisoprolol       | 57    | bleomycin         |
| 58    | bortezomib    | 59    | bosentan         | 60    | bretylium         |
| 61    | brimonidine   | 62    | brinzolamide     | 63    | bromocriptine     |
| 64    | budesonide    | 65    | bumetanide       | 66    | bupivacaine       |
| 67    | bupropion     | 68    | bupirone         | 69    | cabergoline       |
| 70    | caffeine      | 71    | candesartan      | 72    | capecitabine      |
| 73    | captopril     | 74    | carbachol        | 75    | carbamazepine     |
| 76    | carbinoxamine | 77    | carnitine        | 78    | carteolol         |
| 79    | carvedilol    | 80    | cefaclor         | 81    | cefadroxil        |
| 82    | cefazolin     | 83    | cefdinir         | 84    | cefditoren        |
| 85    | cefepime      | 86    | cefixime         | 87    | cefoperazone      |
| 88    | cefotaxime    | 89    | cefotetan        | 90    | cefoxitin         |
| 91    | cefpodoxime   | 92    | cefprozil        | 93    | ceftazidime       |
| 94    | ceftizoxime   | 95    | ceftriaxone      | 96    | cefuroxime        |

|     |                 |     |                   |     |                 |
|-----|-----------------|-----|-------------------|-----|-----------------|
| 97  | celecoxib       | 98  | cephalexin        | 99  | cephradine      |
| 100 | cetirizine      | 101 | chloramphenicol   | 102 | chloroquine     |
| 103 | chlorothiazide  | 104 | chlorpheniramine  | 105 | chlorpromazine  |
| 106 | chlorpropamide  | 107 | chlorthalidone    | 108 | chlorzoxazone   |
| 109 | ciclesonide     | 110 | cidofovir         | 111 | cimetidine      |
| 112 | cinoxacin       | 113 | ciprofloxacin     | 114 | citalopram      |
| 115 | clemastine      | 116 | clindamycin       | 117 | clobetasol      |
| 118 | clofazimine     | 119 | clomipramine      | 120 | clonidine       |
| 121 | clotrimazole    | 122 | clozapine         | 123 | cromolyn        |
| 124 | cyclobenzaprine | 125 | cycloserine       | 126 | cyproheptadine  |
| 127 | cysteamine      | 128 | dacarbazine       | 129 | danazol         |
| 130 | dantrolene      | 131 | dapsone           | 132 | daunorubicin    |
| 133 | delavirdine     | 134 | demeclocycline    | 135 | desflurane      |
| 136 | desipramine     | 137 | desloratadine     | 138 | desoximetasone  |
| 139 | dexamethasone   | 140 | dexmedetomidine   | 141 | dexrazoxane     |
| 142 | diazoxide       | 143 | diclofenac        | 144 | dicloxacillin   |
| 145 | dicyclomine     | 146 | didanosine        | 147 | diflunisal      |
| 148 | digoxin         | 149 | dihydroergotamine | 150 | diltiazem       |
| 151 | diphenhydramine | 152 | dipivefrin        | 153 | disopyramide    |
| 154 | disulfiram      | 155 | dobutamine        | 156 | docetaxel       |
| 157 | dofetilide      | 158 | dolasetron        | 159 | donepezil       |
| 160 | dopamine        | 161 | doxazosin         | 162 | doxepin         |
| 163 | doxorubicin     | 164 | doxycycline       | 165 | droperidol      |
| 166 | dutasteride     | 167 | echothiophate     | 168 | econazole       |
| 169 | efavirenz       | 170 | emedastine        | 171 | enalapril       |
| 172 | enflurane       | 173 | entacapone        | 174 | epinephrine     |
| 175 | eplerenone      | 176 | eprosartan        | 177 | ergotamine      |
| 178 | ertapenem       | 179 | erythromycin      | 180 | esmolol         |
| 181 | estradiol       | 182 | estramustine      | 183 | ethacrynic acid |
| 184 | ethambutol      | 185 | ethionamide       | 186 | ethosuximide    |
| 187 | ethotoin        | 188 | etodolac          | 189 | etomidate       |
| 190 | etoposide       | 191 | exemestane        | 192 | ezetimibe       |
| 193 | famciclovir     | 194 | famotidine        | 195 | felodipine      |
| 196 | fenofibrate     | 197 | fenoldopam        | 198 | fenoprofen      |
| 199 | fexofenadine    | 200 | finasteride       | 201 | flavoxate       |

|     |                      |     |                     |     |                     |
|-----|----------------------|-----|---------------------|-----|---------------------|
| 202 | flecainide           | 203 | fluconazole         | 204 | fludarabine         |
| 205 | fludrocortisone      | 206 | flumazenil          | 207 | flunisolide         |
| 208 | fluocinonide         | 209 | fluorometholone     | 210 | fluoxetine          |
| 211 | fluphenazine         | 212 | flurbiprofen        | 213 | flutamide           |
| 214 | fluticasone          | 215 | fluvastatin         | 216 | fluvoxamine         |
| 217 | formoterol           | 218 | foscarnet           | 219 | fosfomycin          |
| 220 | fosinopril           | 221 | fosphenytoin        | 222 | fulvestrant         |
| 223 | furosemide           | 224 | gabapentin          | 225 | galantamine         |
| 226 | ganciclovir          | 227 | gatifloxacin        | 228 | gefitinib           |
| 229 | gemcitabine          | 230 | gemfibrozil         | 231 | gemifloxacin        |
| 232 | glimepiride          | 233 | glipizide           | 234 | glycopyrrolate      |
| 235 | griseofulvin         | 236 | guanethidine        | 237 | guanfacine          |
| 238 | halofantrine         | 239 | haloperidol         | 240 | halothane           |
| 241 | hexachlorophene      | 242 | hydralazine         | 243 | hydrochlorothiazide |
| 244 | hydroflumethiazide   | 245 | hydroxocobalamin    | 246 | hydroxychloroquine  |
| 247 | hydroxyurea          | 248 | hydroxyzine         | 249 | ibuprofen           |
| 250 | ibutilide            | 251 | idarubicin          | 252 | iloprost            |
| 253 | imatinib             | 254 | imipramine          | 255 | imiquimod           |
| 256 | indapamide           | 257 | indinavir           | 258 | indomethacin        |
| 259 | irbesartan           | 260 | irinotecan          | 261 | isocarboxazid       |
| 262 | isoflurane           | 263 | isoniazid           | 264 | isoproterenol       |
| 265 | isosorbide dinitrate | 266 | isradipine          | 267 | itraconazole        |
| 268 | ivermectin           | 269 | kanamycin           | 270 | ketamine            |
| 271 | ketoconazole         | 272 | ketoprofen          | 273 | ketorolac           |
| 274 | labetalol            | 275 | lactulose           | 276 | lamivudine          |
| 277 | lamotrigine          | 278 | lansoprazole        | 279 | latanoprost         |
| 280 | leflunomide          | 281 | letrozole           | 282 | leucovorin          |
| 283 | levetiracetam        | 284 | levobunolol         | 285 | levocabastine       |
| 286 | lidocaine            | 287 | lincomycin          | 288 | lindane             |
| 289 | lisinopril           | 290 | lithium             | 291 | lomefloxacin        |
| 292 | loperamide           | 293 | loratadine          | 294 | lorazepam           |
| 295 | losartan             | 296 | lovastatin          | 297 | loxapine            |
| 298 | malathion            | 299 | maprotiline         | 300 | mebendazole         |
| 301 | mecamylamine         | 302 | medroxyprogesterone | 303 | mefenamic acid      |
| 304 | mefloquine           | 305 | megestrol           | 306 | meloxicam           |

|     |                    |     |                |     |                   |
|-----|--------------------|-----|----------------|-----|-------------------|
| 307 | meperidine         | 308 | mephenytoin    | 309 | mepivacaine       |
| 310 | mercaptapurine     | 311 | meropenem      | 312 | mesoridazine      |
| 313 | metaproterenol     | 314 | metformin      | 315 | methadone         |
| 316 | methazolamide      | 317 | methimazole    | 318 | methotrexate      |
| 319 | methyclothiazide   | 320 | methyldopa     | 321 | methylphenidate   |
| 322 | methylprednisolone | 323 | metipranolol   | 324 | metoclopramide    |
| 325 | metolazone         | 326 | metoprolol     | 327 | metronidazole     |
| 328 | mexiletine         | 329 | miconazole     | 330 | midodrine         |
| 331 | mifepristone       | 332 | miglitol       | 333 | milrinone         |
| 334 | minocycline        | 335 | minoxidil      | 336 | mirtazapine       |
| 337 | mitotane           | 338 | mitoxantrone   | 339 | modafinil         |
| 340 | moexipril          | 341 | molindone      | 342 | mometasone        |
| 343 | montelukast        | 344 | morizidine     | 345 | morphine          |
| 346 | moxifloxacin       | 347 | mupirocin      | 348 | mycophenolic acid |
| 349 | nabilone           | 350 | nabumetone     | 351 | nadolol           |
| 352 | naftifine          | 353 | nalbuphine     | 354 | naloxone          |
| 355 | naltrexone         | 356 | naproxen       | 357 | nateglinide       |
| 358 | nelfinavir         | 359 | neomycin       | 360 | nevirapine        |
| 361 | nicardipine        | 362 | nicotine       | 363 | nifedipine        |
| 364 | nilutamide         | 365 | nimodipine     | 366 | nitric oxide      |
| 367 | nitrofurantoin     | 368 | nitroglycerin  | 369 | nitroprusside     |
| 370 | nizatidine         | 371 | norepinephrine | 372 | norfloxacin       |
| 373 | nortriptyline      | 374 | ofloxacin      | 375 | olanzapine        |
| 376 | olopatadine        | 377 | omeprazole     | 378 | ondansetron       |
| 379 | orlistat           | 380 | orphenadrine   | 381 | oxacillin         |
| 382 | oxandrolone        | 383 | oxaprozin      | 384 | oxazepam          |
| 385 | oxcarbazepine      | 386 | oxiconazole    | 387 | oxybutynin        |
| 388 | oxytetracycline    | 389 | paclitaxel     | 390 | pamidronate       |
| 391 | pantoprazole       | 392 | paricalcitol   | 393 | paromomycin       |
| 394 | paroxetine         | 395 | penbutolol     | 396 | penciclovir       |
| 397 | penicillin G       | 398 | penicillin V   | 399 | pentazocine       |
| 400 | pentobarbital      | 401 | pentoxifylline | 402 | perindopril       |
| 403 | perphenazine       | 404 | phenelzine     | 405 | phenoxybenzamine  |
| 406 | phentolamine       | 407 | phenytoin      | 408 | pilocarpine       |
| 409 | pimecrolimus       | 410 | pimozide       | 411 | pindolol          |

|     |                  |     |                  |     |               |
|-----|------------------|-----|------------------|-----|---------------|
| 412 | pioglitazone     | 413 | piperacillin     | 414 | pirbuterol    |
| 415 | piroxicam        | 416 | polythiazide     | 417 | pramipexole   |
| 418 | pravastatin      | 419 | prazosin         | 420 | prednicarbate |
| 421 | prednisolone     | 422 | prednisone       | 423 | primaquine    |
| 424 | primidone        | 425 | probenecid       | 426 | procainamide  |
| 427 | procaine         | 428 | prochlorperazine | 429 | procyclidine  |
| 430 | progesterone     | 431 | promethazine     | 432 | propafenone   |
| 433 | propantheline    | 434 | propofol         | 435 | propranolol   |
| 436 | propylthiouracil | 437 | protriptyline    | 438 | pyrazinamide  |
| 439 | pyridostigmine   | 440 | pyrimethamine    | 441 | quetiapine    |
| 442 | quinapril        | 443 | quinidine        | 444 | rabeprazole   |
| 445 | raloxifene       | 446 | ramipril         | 447 | ranolazine    |
| 448 | remifentanil     | 449 | repaglinide      | 450 | reserpine     |
| 451 | ribavirin        | 452 | rifabutin        | 453 | rifapentine   |
| 454 | riluzole         | 455 | rimexolone       | 456 | risedronate   |
| 457 | risperidone      | 458 | ritonavir        | 459 | rivastigmine  |
| 460 | ropinirole       | 461 | ropivacaine      | 462 | rosiglitazone |
| 463 | salmeterol       | 464 | saquinavir       | 465 | secobarbital  |
| 466 | selegiline       | 467 | sertraline       | 468 | sildenafil    |
| 469 | simvastatin      | 470 | sotalol          | 471 | spectinomycin |
| 472 | spironolactone   | 473 | stavudine        | 474 | streptomycin  |
| 475 | sufentanil       | 476 | sulfadiazine     | 477 | sulfasalazine |
| 478 | sulfipyrazone    | 479 | sulfisoxazole    | 480 | sulindac      |
| 481 | sumatriptan      | 482 | tacrolimus       | 483 | tadalafil     |
| 484 | tamoxifen        | 485 | tamsulosin       | 486 | tazarotene    |
| 487 | telmisartan      | 488 | temazepam        | 489 | teniposide    |
| 490 | terazosin        | 491 | terbinafine      | 492 | terbutaline   |
| 493 | terconazole      | 494 | testosterone     | 495 | tetracycline  |
| 496 | theophylline     | 497 | thiabendazole    | 498 | thioridazine  |
| 499 | thyroxine        | 500 | tiagabine        | 501 | ticlopidine   |
| 502 | tiludronate      | 503 | timolol          | 504 | tiotropium    |
| 505 | tirofiban        | 506 | tizanidine       | 507 | tobramycin    |
| 508 | tolazamide       | 509 | tolazoline       | 510 | tolbutamide   |
| 511 | tolmetin         | 512 | tolterodine      | 513 | topiramate    |
| 514 | topotecan        | 515 | toremifene       | 516 | tramadol      |

|     |                  |     |                 |     |                 |
|-----|------------------|-----|-----------------|-----|-----------------|
| 517 | trandolapril     | 518 | tranexamic acid | 519 | travoprost      |
| 520 | trazodone        | 521 | treprostinil    | 522 | triamcinolone   |
| 523 | triamterene      | 524 | trifluoperazine | 525 | trihexyphenidyl |
| 526 | triiodothyronine | 527 | trimethoprim    | 528 | trimetrexate    |
| 529 | trimipramine     | 530 | tropicamide     | 531 | trovafloxacin   |
| 532 | valacyclovir     | 533 | valproic acid   | 534 | valsartan       |
| 535 | vancomycin       | 536 | venlafaxine     | 537 | verapamil       |
| 538 | vinblastine      | 539 | vincristine     | 540 | vinorelbine     |
| 541 | voriconazole     | 542 | warfarin        | 543 | zafirlukast     |
| 544 | zalcitabine      | 545 | zidovudine      | 546 | ziprasidone     |
| 547 | zolpidem         | 548 | zonisamide      |     |                 |

---
